# Supplementary material for: microProtein Prediction Program (miP3): A Software for Predicting microProteins and Their Target Transcription Factors
Source: Hindawi journal article supplement (doi:10.1155/2015/734147), 2015-01-01
Supplement: f1 [file 734147.f1.pdf]

1 **SUPPLEMENTAL DATA**

2 **Supplemental table 1.** Number of true positives and false negatives based on the 17  
 3 characterized miPs (Supplemental table 2) found with different e-value parameters. Highlighted  
 4 row has the best performance and its parameters were set as default in miP3.

| Param 1:<br>e-value all | Param 2:<br>e-value small | Param 3:<br>e-value reblast | true<br>positive | false<br>negative | Recall | Number of<br>predicted<br>miPs |
|-------------------------|---------------------------|-----------------------------|------------------|-------------------|--------|--------------------------------|
| 1e-7                    | 0.5                       | 0.1                         | 10               | 7                 | 0.59   | 875                            |
| 1e-6                    | 0.5                       | 0.1                         | 10               | 7                 | 0.59   | 891                            |
| 1e-5                    | 0.5                       | 0.1                         | 10               | 7                 | 0.59   | 915                            |
| 1e-5                    | 0.5                       | 0.1                         | 10               | 7                 | 0.59   | 915                            |
| 1e-6                    | 1                         | 0.1                         | 10               | 7                 | 0.59   | 920                            |
| 1e-5                    | 1                         | 0.1                         | 10               | 7                 | 0.59   | 944                            |
| 1e-7                    | 0.1                       | 0.01                        | 9                | 8                 | 0.53   | 770                            |
| 1e-7                    | 0.5                       | 0.01                        | 9                | 8                 | 0.53   | 774                            |
| 1e-7                    | 1                         | 0.01                        | 9                | 8                 | 0.53   | 775                            |
| 1e-6                    | 0.1                       | 0.01                        | 9                | 8                 | 0.53   | 786                            |
| 1e-6                    | 0.1                       | 0.01                        | 9                | 8                 | 0.53   | 786                            |
| 1e-6                    | 0.5                       | 0.01                        | 9                | 8                 | 0.53   | 790                            |
| 1e-6                    | 1                         | 0.01                        | 9                | 8                 | 0.53   | 791                            |
| 1e-5                    | 0.1                       | 0.01                        | 9                | 8                 | 0.53   | 810                            |
| 1e-5                    | 1                         | 0.01                        | 9                | 8                 | 0.53   | 815                            |
| 1e-6                    | 0.1                       | 0.1                         | 9                | 8                 | 0.53   | 815                            |
| 1e-6                    | 0.1                       | 0.1                         | 9                | 8                 | 0.53   | 815                            |
| 1e-4                    | 0.1                       | 0.01                        | 9                | 8                 | 0.53   | 824                            |
| 1e-4                    | 0.1                       | 0.01                        | 9                | 8                 | 0.53   | 824                            |
| 1e-4                    | 1                         | 0.01                        | 9                | 8                 | 0.53   | 829                            |
| 1e-7                    | 0.5                       | 1e-5                        | 8                | 9                 | 0.47   | 718                            |
| 1e-7                    | 1                         | 1e-5                        | 8                | 9                 | 0.47   | 718                            |
| 1e-7                    | 0.1                       | 1e-5                        | 8                | 9                 | 0.47   | 718                            |
| 1e-7                    | 0.1                       | 1e-5                        | 8                | 9                 | 0.47   | 718                            |
| 1e-7                    | 0.1                       | 1e-4                        | 8                | 9                 | 0.47   | 732                            |
| 1e-7                    | 0.1                       | 1e-4                        | 8                | 9                 | 0.47   | 732                            |

|      |     |       |   |    |      |     |
|------|-----|-------|---|----|------|-----|
| 1e-7 | 0.5 | 1e-4  | 8 | 9  | 0.47 | 732 |
| 1e-6 | 0.1 | 1e-5  | 8 | 9  | 0.47 | 734 |
| 1e-6 | 1   | 1e-5  | 8 | 9  | 0.47 | 734 |
| 1e-7 | 0.1 | 1e-3  | 8 | 9  | 0.47 | 743 |
| 1e-6 | 0.1 | 1e-4  | 8 | 9  | 0.47 | 748 |
| 1e-6 | 0.5 | 1e-4  | 8 | 9  | 0.47 | 748 |
| 1e-6 | 0.5 | 1e-4  | 8 | 9  | 0.47 | 748 |
| 1e-6 | 1   | 1e-4  | 8 | 9  | 0.47 | 748 |
| 1e-6 | 0.1 | 1e-3  | 8 | 9  | 0.47 | 759 |
| 1e-5 | 1   | 1e-5  | 8 | 9  | 0.47 | 759 |
| 1e-5 | 0.5 | 1e-5  | 8 | 9  | 0.47 | 759 |
| 1e-5 | 0.5 | 1e-5  | 8 | 9  | 0.47 | 759 |
| 1e-6 | 1   | 1e-3  | 8 | 9  | 0.47 | 759 |
| 1e-5 | 0.1 | 1e-4  | 8 | 9  | 0.47 | 773 |
| 1e-5 | 0.1 | 1e-4  | 8 | 9  | 0.47 | 773 |
| 1e-5 | 1   | 1e-4  | 8 | 9  | 0.47 | 773 |
| 1e-5 | 0.5 | 1e-4  | 8 | 9  | 0.47 | 773 |
| 1e-4 | 0.5 | 1e-5  | 8 | 9  | 0.47 | 774 |
| 1e-4 | 0.1 | 1e-5  | 8 | 9  | 0.47 | 774 |
| 1e-4 | 1   | 1e-5  | 8 | 9  | 0.47 | 774 |
| 1e-4 | 0.5 | 1e-5  | 8 | 9  | 0.47 | 774 |
| 1e-4 | 0.1 | 1e-5  | 8 | 9  | 0.47 | 774 |
| 1e-4 | 1   | 1e-5  | 8 | 9  | 0.47 | 774 |
| 1e-5 | 0.1 | 1e-3  | 8 | 9  | 0.47 | 783 |
| 1e-5 | 1   | 1e-3  | 8 | 9  | 0.47 | 783 |
| 1e-4 | 0.1 | 1e-4  | 8 | 9  | 0.47 | 787 |
| 1e-4 | 0.5 | 1e-4  | 8 | 9  | 0.47 | 787 |
| 1e-4 | 0.5 | 1e-4  | 8 | 9  | 0.47 | 787 |
| 1e-4 | 1   | 1e-4  | 8 | 9  | 0.47 | 787 |
| 1e-4 | 0.5 | 1e-3  | 8 | 9  | 0.47 | 797 |
| 1e-4 | 0.1 | 1e-3  | 8 | 9  | 0.47 | 797 |
| 1e-4 | 0.1 | 1e-3  | 8 | 9  | 0.47 | 797 |
| 1e-4 | 1   | 1e-23 | 6 | 11 | 0.35 | 763 |
| 1e-4 | 1   | 1e-23 | 6 | 11 | 0.35 | 763 |

|      |     |       |   |    |      |     |
|------|-----|-------|---|----|------|-----|
| 1e-4 | 0.1 | 1e-23 | 6 | 11 | 0.35 | 763 |
| 1e-7 | 0.5 | 1e-23 | 5 | 12 | 0.29 | 691 |
| 1e-7 | 0.5 | 1e-23 | 5 | 12 | 0.29 | 691 |
| 1e-7 | 0.1 | 1e-23 | 5 | 12 | 0.29 | 691 |
| 1e-7 | 1   | 1e-23 | 5 | 12 | 0.29 | 691 |
| 1e-6 | 1   | 1e-23 | 5 | 12 | 0.29 | 710 |
| 1e-6 | 1   | 1e-23 | 5 | 12 | 0.29 | 710 |
| 1e-6 | 0.1 | 1e-23 | 5 | 12 | 0.29 | 710 |
| 1e-5 | 0.5 | 1e-23 | 5 | 12 | 0.29 | 738 |
| 1e-5 | 0.5 | 1e-23 | 5 | 12 | 0.29 | 738 |
| 1e-5 | 0.1 | 1e-23 | 5 | 12 | 0.29 | 738 |

1

2

3

1 **Supplemental table 2.** *A. thaliana* miPs that have been characterized in the literature or that  
2 have been tested in yeast two hybrid assays in a previous study [2]. Green: known or putative  
3 miPs detected by miP3. Yellow: A known miP not detected by miP3 because the protein  
4 sequence is not available in the TAIR database [15]. Red: A known miP not detected by miP3  
5 because it is too divergent in sequence from any TF. Orange: bHLH miP not detected by miP3  
6 because they contain the bHLH domain (IPR011598) but are missing the basic residues  
7 upstream of the HLH domain.

| Locus name | Previously characterized | Predicted by miP3 | Physically interacts | Gene name (Reference)                    |
|------------|--------------------------|-------------------|----------------------|------------------------------------------|
| At1G14760  | Yes                      | Yes               |                      | KNATM [6, 7]                             |
| AT2G45450  | Yes                      | No                |                      | LITTLE ZIPPER 1 [4, 5]                   |
| AT3G60890  | Yes                      | Yes               |                      | LITTLE ZIPPER 2 [4, 5]                   |
| AT3G52770  | Yes                      | Yes               |                      | LITTLE ZIPPER 3 [4, 5]                   |
| AT2G36307  | Yes                      | No                |                      | LITTLE ZIPPER 4 [4, 5]                   |
| AT1G74660  | Yes                      | Yes               |                      | MINI ZINC FINGER 1 [16]                  |
| AT3G28917  | Yes                      | Yes               |                      | MINI ZINC FINGER 2 [16]                  |
| AT1G18835  | Yes                      | Yes               |                      | MINI ZINC FINGER 3 [16]                  |
| AT2G42870  | Yes                      | Yes               |                      | PHYTOCHROME RAPIDLY REGULATED1 [17, 18]  |
| AT3G58850  | Yes                      | Yes               |                      | PHYTOCHROME RAPIDLY REGULATED2 [17, 18]  |
| AT1G02340  | Yes                      | No                |                      | LONG HYPOCOTYL IN FR 1 [19]              |
| AT1G74500  | Yes                      | No                |                      | ACTIVATION-TAGGED BRI1-SUPPRESSOR 1 [21] |
| AT3G05800  | Yes                      | No                |                      | ATBS1-INTERACTING FACTOR 1 [21]          |
| AT5G39860  | Yes                      | No                |                      | PACLOBUTRAZOL RESISTANCE1 [22]           |
| AT1G26945  | Yes                      | No                |                      | KIDARI [23]                              |
| AT5G07260* | Yes                      | Yes               |                      | LITTLE SIPPER [2]                        |
| AT1G09950  | Yes                      | Yes               |                      | RESPONSE TO ABA AND SALT 1 [2]           |
| AT1G15215  | No                       | Yes               | Yes [2]              | Uncharacterized                          |
| AT3G19550  | No                       | Yes               | Yes [2]              | Uncharacterized                          |
| AT1G61200  | No                       | Yes               | No [2]               | Uncharacterized                          |
| AT3G19530  | No                       | Yes               | No [2]               | Uncharacterized                          |
| AT1G20280  | No                       | Yes               | No [2]               | Uncharacterized                          |

8 \*LITTLE SIPPER's locus name was misprinted as AT4G26920 in [2]. AT4G26920 is a paralog of LITTLE  
9 SIPPER. Corrections will be published in Plant Physiology.
